# Supplementary material for: The transcription factor AREB1 regulates primary metabolic pathways in tomato fruits
Source: PubMed Central journal article supplement (PMC4036503; doi:10.1093/jxb/eru114), 2014-03-22
Supplement: supp_eru114_jexbot112896_file001.pdf [file supp_eru114_jexbot112896_file001.pdf]

**The transcription factor SIAREB1 regulates primary metabolic pathways in tomato fruits**  
 Bastías A, Yañez M, Osorio S, Arbona V, Gómez-Cadenas A, Fernie AR, Casaretto JA

**Table S1. Primer sequences used in real time quantitative PCR analysis**

| Gene name    | Accession   | Primer | Forward primer (5' - 3')          |
|--------------|-------------|--------|-----------------------------------|
| EF1 $\alpha$ | X14449      | FWD    | ACCACGAAGCTCTCCAGGAG              |
|              |             | REV    | CATTGAACCCAACATTGTCACC            |
| TIV1         | M81081      | FWD    | AAGTGGACAAAAGTCGCGCTT             |
|              |             | REV    | TGGTCCCAAAATGCCTCTG               |
| LIN5         | AJ272304    | FWD    | TTGGAAGGGATTGAGAATCGA             |
|              |             | REV    | CGGATTCATTTGACCAACCC              |
| LIN7         | AF506006    | FWD    | TTTGGTGCTGGTGGAAAGACA             |
|              |             | REV    | GGCTCCGTTCCGTTGTAAAC              |
| SUS2         | AJ011535    | FWD    | TTTGGTCTGACTGTTGTGCAAG            |
|              |             | REV    | GTCGAAATGGTTTCCCAATG              |
| SUS3         | AJ011319    | FWD    | GAACGAAGAACACCTGTGTGT             |
|              |             | REV    | TCTCTGCCTGCTCTTCCA                |
| SPS          | AY726439    | FWD    | GATAGTGCTGCTCTCCTTTCAGG           |
|              |             | REV    | TGGTGCTTGTGATAACGAGTTCTG          |
| AGPase       | L41126      | FWD    | TAAATCGCCACCTTTCACGG              |
|              |             | REV    | CGGACTTTGTTGAGCAGCAAG             |
| PEPC         | SGN-U576244 | FWD    | GCACATCCCACGCAAATAAACC            |
|              |             | REV    | AAACCAGCCCTAGCTTCATCAAC           |
| ACOH         | AY250115    | FWD    | TGCGATGAATCCTCTCGAAGCTC           |
|              |             | REV    | TGCCAAGGGACCAATGTTGTTGG           |
| OGDH-E2b     | SGN-U568072 | FWD    | TTCAAACGGTGGAGTGTATGGAAG          |
|              |             | REV    | TGCATTCCCAAGATAGCAGACTGG          |
| SDH2-1       | SGN-U563725 | FWD    | CTTTGGGCAAGCACGAGAACAG            |
|              |             | REV    | CGCCTGGACGCAGTTAATGATG            |
| SDH2-2       | SGN-U563726 | FWD    | TTCGGACTCCAAGCACAGAAC             |
|              |             | REV    | TCTGGAGTCCATCGGTACATTCG           |
| FUM          | AK325138    | FWD    | TGCTCGTCACATGCTTGAACCC            |
|              |             | REV    | CCTTGTGCGCTTTCTTGGCAAC            |
| mMDH         | SGN-U565568 | FWD    | ACGCTTGGTAAGTGCCTGAATGTC          |
|              |             | REV    | TTTCCCAAGCCACTCCAAGTGC            |
| GS1          | AF200360    | FWD    | CATTGTTGACGCCATTACA               |
|              |             | REV    | ATGCCAACAGAAGGTCCAAC              |
| GS2          | U15059      | FWD    | CCCTTGAGGCTGAAGCTCT               |
|              |             | REV    | GATGTTCAAAGTAGTCCA                |
| GLT1         | SGN-U575484 | FWD    | CAG CCT TGA AGT TGG ACC TGT TG    |
|              |             | REV    | TGT GAA AGG ACT GGA GGT GAT ACG   |
| GDH          | SGN-U276420 | FWD    | CCA GAG CAC AGG GTA TAA GAA CAT C |
|              |             | REV    | ATT CAC GAG ATA GGT GGC AAA GTA G |
| AST1         | SGN-U567172 | FWD    | GGAGTAGAGGTTGATGGATTTGG           |
|              |             | REV    | GGGACAGGAGGTCTGAGAGTAAC           |
| AS1          | AY240926    | FWD    | GCTCGATACTTGGCTGGAAC              |
|              |             | REV    | TCGCAGCCTTAAGATCTGGT              |

|          |             |     |                                   |
|----------|-------------|-----|-----------------------------------|
| AGPR     | SGN-U562906 | FWD | CTGGCCAATCAATCGAATCT              |
|          |             | REV | CAGCATCCACAGCAGAGAAA              |
| AK       | SGN-U569440 | FWD | ATCAGTAGCCTCAGCCGAAA              |
|          |             | REV | GCCAGCAAAGGTTGTTTGT               |
| TS       | SGN-U573081 | FWD | CAGCCACAAACGATGCGATTTC            |
|          |             | REV | TGCCCTTCCAACCTCAAACCTATTC         |
| TD       | BG628643    | FWD | CAGGGTTAGGTTTCAGGCAAA             |
|          |             | REV | TTCAAAGAGCCCACAAGTCC              |
| AHASS1,2 | SGN-U572742 | FWD | CACTCCTGGGCCATACTTGT              |
|          |             | REV | TAGGAACGTCTCCCATCACC              |
| KARI     | SGN-U572725 | FWD | GTGAGATCAGGAGCGTTGTCTTG           |
|          |             | REV | GCAGGTAAGCCCTCCTTTTCAT            |
| BCAT1    | SGN-U569626 | FWD | AGGGCTCTATTTACTTCTTTTGAG          |
|          |             | REV | CATACACATTCTTTTAGCACCAATT         |
| BCAT7    | SGN-U565681 | FWD | GTCATGGAGCTTGTGCTGAA              |
|          |             | REV | AGCTCCCCCATAGTTCCTGT              |
| IGPS     | SGN-U563660 | FWD | GGA AGG AGA GCG TGG GGA AAG       |
|          |             | REV | TGG ATA GGA ACA AGT AGG AGT CAG C |
| TSB      | SGN-U581112 | FWD | TCA CAG ATG AGG AGG CTT TGG AAG   |
|          |             | REV | ACT CTT TGG GAC AAG TGT TAC GAA C |
| AROD     | AI773917    | FWD | GGCTTTGGAACTTTGGACA               |
|          |             | REV | GGGATTGTGCTATGAGGGAAT             |
| PAL      | SGN-U232238 | FWD | TCTTGTCCCGTTGTCATACATTGC          |
|          |             | REV | ACCATTGATGCCATACCAGAACC           |
| P5CS     | U60267      | FWD | CAGTGGCTTTGCGACAGATA              |
|          |             | REV | CACGAGCATCAGTCTCTCCA              |
| P5CR     | SGN-U567857 | FWD | AGGGGTGGCTGCTGGTTTAC              |
|          |             | REV | AACAACCTGCATTCATCAAGATACCG        |
| PRODH    | SGN-U578070 | FWD | CAGGAAAACCTGCTGCATCC              |
|          |             | REV | TGAAAGCCCTTCTGCCATAC              |
| ACS2     | AY326958    | FWD | TGGAGAAAACAAGAGGAGGAAGA           |
|          |             | REV | GGCACCACCAGCCATAACA               |
| ACS4     | M63490      | FWD | CCATCTTGTTTGCACGAAATA             |
|          |             | REV | CGATGCTAACGAATTTTGGAGAA           |
| ACO1     | EF501822    | FWD | AAATCATGAAGGAGTTTGCTGATAAA        |
|          |             | REV | TTTTCACACAGCAAATCCAACAG           |
| ACO3     | X58885      | FWD | ACGGGAAGTACAAGAGCGTGAT            |
|          |             | REV | CTAGTGACATCCGAGTCCCATCT           |
| XTH5     | AY497475    | FWD | GGATTCAGCCATCTCTTTGGTG            |
|          |             | REV | GAACCCTGAACCTGTGTTTGG             |
| PG1      | X14074      | FWD | GGCAATGGACAAGTATGGTGG             |
|          |             | REV | CAGAAGGTTAAGGCCGTTGGT             |
| EXP3     | AF059487    | FWD | TTTGCGGAGCTTGCTTTGAA              |
|          |             | REV | GGAGCACAAAATTCGTTGCAG             |
| XET4     | AF186777    | FWD | CTGCTGGTGTTGTCCTGCT               |
|          |             | REV | ATGTATGGCTGACCGTTTCT              |

**Table S2. Relative metabolite contents in fruit pericarp of wild type tomato.** Metabolites were determined as described in Materials and Methods. Data are normalized with respect to mean response calculated for the wild type. Values are presented as means  $\pm$  SE of four individual fruits per line, and values in boldface were determined by t test to be significantly different ( $p \leq 0.05$ ) from immature green development stage. nd, not detected.

| Development Stage                | IG                | MG                                  | RR                                   |
|----------------------------------|-------------------|-------------------------------------|--------------------------------------|
| <b>Amino acids</b>               |                   |                                     |                                      |
| Alanine                          | 1.000 $\pm$ 0.033 | 1.176 $\pm$ 0.097                   | 0.785 $\pm$ 0.130                    |
| Arginine                         | 1.000 $\pm$ 0.025 | 0.958 $\pm$ 0.036                   | <b>1.177 <math>\pm</math> 0.002</b>  |
| Aspartate                        | 1.000 $\pm$ 0.032 | <b>1.467 <math>\pm</math> 0.130</b> | <b>5.116 <math>\pm</math> 0.400</b>  |
| Alanine, beta                    | 1.000 $\pm$ 0.010 | 1.268 $\pm$ 0.133                   | <b>0.387 <math>\pm</math> 0.059</b>  |
| GABA                             | 1.000 $\pm$ 0.033 | <b>1.644 <math>\pm</math> 0.220</b> | <b>0.509 <math>\pm</math> 0.023</b>  |
| Glutamate                        | 1.000 $\pm$ 0.085 | 1.303 $\pm$ 0.162                   | <b>21.428 <math>\pm</math> 2.837</b> |
| Glutamine                        | 1.000 $\pm$ 0.108 | <b>2.445 <math>\pm</math> 0.497</b> | <b>1.682 <math>\pm</math> 0.214</b>  |
| Glycine                          | 1.000 $\pm$ 0.076 | <b>1.516 <math>\pm</math> 0.164</b> | <b>0.597 <math>\pm</math> 0.055</b>  |
| Histidine                        | 1.000 $\pm$ 0.001 | <b>1.904 <math>\pm</math> 0.369</b> | <b>3.988 <math>\pm</math> 0.282</b>  |
| Isoleucine                       | 1.000 $\pm$ 0.048 | <b>1.725 <math>\pm</math> 0.169</b> | 1.190 $\pm$ 0.139                    |
| Methionine                       | 1.000 $\pm$ 0.069 | 1.589 $\pm$ 0.284                   | <b>3.275 <math>\pm</math> 0.150</b>  |
| Phenylalanine                    | 1.000 $\pm$ 0.079 | 1.626 $\pm$ 0.384                   | 0.812 $\pm$ 0.114                    |
| Proline                          | 1.000 $\pm$ 0.110 | <b>1.892 <math>\pm</math> 0.318</b> | <b>1.800 <math>\pm</math> 0.275</b>  |
| Pyroglutamic acid                | 1.000 $\pm$ 0.086 | 1.287 $\pm$ 0.119                   | <b>2.429 <math>\pm</math> 0.218</b>  |
| Serine                           | 1.000 $\pm$ 0.016 | <b>3.981 <math>\pm</math> 0.398</b> | <b>3.375 <math>\pm</math> 0.328</b>  |
| Treonine                         | 1.000 $\pm$ 0.025 | <b>2.507 <math>\pm</math> 0.246</b> | <b>2.846 <math>\pm</math> 0.187</b>  |
| Tryptophan                       | 1.000 $\pm$ 0.132 | 2.043 $\pm$ 0.423                   | <b>2.062 <math>\pm</math> 0.305</b>  |
| Valine                           | 1.000 $\pm$ 0.070 | <b>1.616 <math>\pm</math> 0.178</b> | <b>0.462 <math>\pm</math> 0.055</b>  |
| <b>Organic acids</b>             |                   |                                     |                                      |
| Citric acid                      | 1.000 $\pm$ 0.087 | <b>1.392 <math>\pm</math> 0.088</b> | <b>1.991 <math>\pm</math> 0.258</b>  |
| Glyceric acid                    | 1.000 $\pm$ 0.019 | 1.009 $\pm$ 0.075                   | <b>3.974 <math>\pm</math> 1.083</b>  |
| Malic acid                       | 1.000 $\pm$ 0.042 | 1.068 $\pm$ 0.054                   | <b>0.548 <math>\pm</math> 0.036</b>  |
| Phosphoric acid                  | 1.000 $\pm$ 0.055 | 0.952 $\pm$ 0.034                   | <b>1.315 <math>\pm</math> 0.047</b>  |
| Quinic acid, 3-caffeoyl-, cis-   | 1.000 $\pm$ 0.007 | 1.073 $\pm$ 0.034                   | nd                                   |
| Quinic acid, 3-caffeoyl-, trans- | 1.000 $\pm$ 0.029 | <b>0.605 <math>\pm</math> 0.143</b> | <b>0.316 <math>\pm</math> 0.026</b>  |
| Saccharic acid                   | 1.000 $\pm$ 0.041 | 1.362 $\pm$ 0.141                   | 0.963 $\pm$ 0.088                    |
| Succinic acid                    | 1.000 $\pm$ 0.025 | <b>0.496 <math>\pm</math> 0.036</b> | 1.065 $\pm$ 0.225                    |
| Threonic acid                    | 1.000 $\pm$ 0.105 | 0.805 $\pm$ 0.104                   | <b>1.672 <math>\pm</math> 0.145</b>  |
| <b>Sugars and Sugars Alcohol</b> |                   |                                     |                                      |
| Erythritol                       | nd                | nd                                  | 1.000 $\pm$ 0.061                    |
| Fructose                         | 1.000 $\pm$ 0.026 | 1.041 $\pm$ 0.024                   | <b>1.219 <math>\pm</math> 0.010</b>  |
| Fucose                           | 1.000 $\pm$ 0.057 | 1.228 $\pm$ 0.075                   | <b>1.241 <math>\pm</math> 0.058</b>  |
| Galactinol                       | 1.000 $\pm$ 0.015 | nd                                  | <b>5.007 <math>\pm</math> 0.001</b>  |
| Glucose                          | 1.000 $\pm$ 0.035 | 1.016 $\pm$ 0.035                   | <b>1.175 <math>\pm</math> 0.033</b>  |
| Maltose                          | 1.000 $\pm$ 0.044 | <b>1.401 <math>\pm</math> 0.088</b> | <b>4.045 <math>\pm</math> 0.828</b>  |
| Myo-inositol                     | 1.000 $\pm$ 0.005 | <b>0.605 <math>\pm</math> 0.027</b> | <b>0.501 <math>\pm</math> 0.030</b>  |
| Raffinose                        | 1.000 $\pm$ 0.076 | <b>0.483 <math>\pm</math> 0.092</b> | nd                                   |
| Rhamnose                         | 1.000 $\pm$ 0.039 | <b>1.322 <math>\pm</math> 0.077</b> | <b>3.220 <math>\pm</math> 0.125</b>  |
| Sucrose                          | 1.000 $\pm$ 0.044 | <b>0.707 <math>\pm</math> 0.036</b> | <b>0.603 <math>\pm</math> 0.096</b>  |
| Trehalose                        | 1.000 $\pm$ 0.001 | <b>0.662 <math>\pm</math> 0.001</b> | <b>0.775 <math>\pm</math> 0.090</b>  |
| Xylose                           | 1.000 $\pm$ 0.031 | 1.086 $\pm$ 0.079                   | <b>2.496 <math>\pm</math> 0.114</b>  |
| <b>Sugar phosphates</b>          |                   |                                     |                                      |
| Fructose-6-phosphate             | 1.000 $\pm$ 0.048 | 0.917 $\pm$ 0.034                   | <b>0.754 <math>\pm</math> 0.046</b>  |
| Glucose-6-phosphate              | 1.000 $\pm$ 0.040 | 0.965 $\pm$ 0.050                   | <b>0.666 <math>\pm</math> 0.033</b>  |
| <b>Others</b>                    |                   |                                     |                                      |
| Putrescine                       | 1.000 $\pm$ 0.084 | <b>2.269 <math>\pm</math> 0.198</b> | <b>2.599 <math>\pm</math> 0.274</b>  |
| Urea                             | 1.000 $\pm$ 0.137 | 1.077 $\pm$ 0.108                   | 0.883 $\pm$ 0.105                    |

**Table S3. Relative metabolite contents in pericarp of immature green fruits of *SIAREB1* transgenic lines.** Metabolites were determined as described in Materials and Methods. Data are normalized with respect to the wild type. Values are presented as means  $\pm$  SE (four individual fruits per line). Values in boldface indicate significantly difference from the wild type ( $p \leq 0.05$ ) as determined by t-test. nd, not detected.

|                                                    | WT                | A3                                  | A4                                  | S2                                   | S3                                   |
|----------------------------------------------------|-------------------|-------------------------------------|-------------------------------------|--------------------------------------|--------------------------------------|
| <b>Amino acids</b>                                 |                   |                                     |                                     |                                      |                                      |
| Alanine                                            | 1.000 $\pm$ 0.033 | <b>1.479 <math>\pm</math> 0.091</b> | <b>1.399 <math>\pm</math> 0.189</b> | <b>4.496 <math>\pm</math> 0.001</b>  | <b>4.546 <math>\pm</math> 0.062</b>  |
| Arginine                                           | 1.000 $\pm$ 0.025 | <b>0.907 <math>\pm</math> 0.009</b> | 0.842 $\pm$ 0.077                   | <b>1.180 <math>\pm</math> 0.099</b>  | 1.046 $\pm$ 0.033                    |
| Aspartate                                          | 1.000 $\pm$ 0.032 | <b>1.318 <math>\pm</math> 0.032</b> | <b>1.453 <math>\pm</math> 0.178</b> | <b>2.844 <math>\pm</math> 0.226</b>  | <b>2.643 <math>\pm</math> 0.026</b>  |
| Alanine, beta                                      | 1.000 $\pm$ 0.010 | <b>1.856 <math>\pm</math> 0.098</b> | <b>1.711 <math>\pm</math> 0.248</b> | <b>10.360 <math>\pm</math> 1.788</b> | <b>10.793 <math>\pm</math> 0.103</b> |
| Phenylalanine                                      | 1.000 $\pm$ 0.079 | <b>2.539 <math>\pm</math> 0.057</b> | <b>2.163 <math>\pm</math> 0.068</b> | <b>4.261 <math>\pm</math> 0.240</b>  | <b>10.971 <math>\pm</math> 0.212</b> |
| GABA                                               | 1.000 $\pm$ 0.033 | 1.225 $\pm$ 0.037                   | 1.205 $\pm$ 0.156                   | <b>3.951 <math>\pm</math> 0.677</b>  | <b>5.572 <math>\pm</math> 0.256</b>  |
| Glutamate                                          | 1.000 $\pm$ 0.085 | 1.152 $\pm$ 0.039                   | 1.306 $\pm$ 0.190                   | <b>2.212 <math>\pm</math> 0.664</b>  | <b>2.838 <math>\pm</math> 0.138</b>  |
| Glutamine                                          | 1.000 $\pm$ 0.108 | <b>1.920 <math>\pm</math> 0.332</b> | <b>3.006 <math>\pm</math> 0.856</b> | <b>6.062 <math>\pm</math> 0.118</b>  | <b>7.440 <math>\pm</math> 1.019</b>  |
| Glycine                                            | 1.000 $\pm$ 0.076 | <b>1.850 <math>\pm</math> 0.096</b> | <b>1.861 <math>\pm</math> 0.328</b> | 2.262 $\pm$ 0.690                    | <b>6.026 <math>\pm</math> 0.129</b>  |
| Histidine                                          | 1.000 $\pm$ 0.001 | 0.984 $\pm$ 0.205                   | 1.347 $\pm$ 0.156                   | <b>5.761 <math>\pm</math> 0.001</b>  | <b>14.744 <math>\pm</math> 0.999</b> |
| Isoleucine                                         | 1.000 $\pm$ 0.048 | <b>2.121 <math>\pm</math> 0.085</b> | <b>2.358 <math>\pm</math> 0.453</b> | <b>6.753 <math>\pm</math> 1.804</b>  | <b>12.430 <math>\pm</math> 0.276</b> |
| Methionine                                         | 1.000 $\pm$ 0.069 | <b>1.347 <math>\pm</math> 0.026</b> | 1.392 $\pm$ 0.305                   | <b>3.127 <math>\pm</math> 0.279</b>  | <b>5.384 <math>\pm</math> 0.074</b>  |
| Proline                                            | 1.000 $\pm$ 0.110 | <b>1.652 <math>\pm</math> 0.121</b> | 1.407 $\pm$ 0.198                   | <b>10.457 <math>\pm</math> 3.135</b> | <b>14.319 <math>\pm</math> 0.228</b> |
| Pyroglutamic acid                                  | 1.000 $\pm$ 0.086 | <b>1.268 <math>\pm</math> 0.030</b> | <b>1.808 <math>\pm</math> 0.052</b> | <b>6.481 <math>\pm</math> 0.383</b>  | <b>5.655 <math>\pm</math> 0.293</b>  |
| Serine                                             | 1.000 $\pm$ 0.016 | <b>1.316 <math>\pm</math> 0.038</b> | <b>1.561 <math>\pm</math> 0.197</b> | <b>9.363 <math>\pm</math> 1.312</b>  | <b>8.755 <math>\pm</math> 0.128</b>  |
| Threonine                                          | 1.000 $\pm$ 0.025 | <b>1.868 <math>\pm</math> 0.034</b> | <b>2.417 <math>\pm</math> 0.517</b> | <b>10.915 <math>\pm</math> 0.921</b> | <b>11.833 <math>\pm</math> 0.141</b> |
| Tryptophan                                         | 1.000 $\pm$ 0.132 | 1.243 $\pm$ 0.171                   | 1.544 $\pm$ 0.304                   | <b>4.372 <math>\pm</math> 0.756</b>  | <b>18.606 <math>\pm</math> 1.259</b> |
| Valine                                             | 1.000 $\pm$ 0.070 | <b>1.809 <math>\pm</math> 0.122</b> | <b>2.100 <math>\pm</math> 0.415</b> | <b>6.497 <math>\pm</math> 1.489</b>  | <b>9.659 <math>\pm</math> 0.123</b>  |
| <b>Organic acids</b>                               |                   |                                     |                                     |                                      |                                      |
| Citric acid                                        | 1.000 $\pm$ 0.087 | 1.133 $\pm$ 0.018                   | 1.290 $\pm$ 0.056                   | <b>3.055 <math>\pm</math> 0.065</b>  | <b>2.813 <math>\pm</math> 0.113</b>  |
| Glyceric acid                                      | 1.000 $\pm$ 0.019 | 1.071 $\pm$ 0.063                   | 0.981 $\pm$ 0.080                   | <b>3.026 <math>\pm</math> 0.167</b>  | <b>4.409 <math>\pm</math> 0.068</b>  |
| Malic acid                                         | 1.000 $\pm$ 0.042 | 1.165 $\pm$ 0.012                   | 1.141 $\pm$ 0.038                   | <b>1.547 <math>\pm</math> 0.052</b>  | <b>1.476 <math>\pm</math> 0.043</b>  |
| Phosphoric acid                                    | 1.000 $\pm$ 0.055 | 1.003 $\pm$ 0.017                   | 1.006 $\pm$ 0.026                   | <b>1.961 <math>\pm</math> 0.030</b>  | <b>2.151 <math>\pm</math> 0.076</b>  |
| Quinic acid, 3-caffeoyl-, cis-                     | 1.000 $\pm$ 0.007 | <b>1.147 <math>\pm</math> 0.045</b> | <b>1.235 <math>\pm</math> 0.054</b> | 0.968 $\pm$ 0.122                    | nd                                   |
| Quinic acid, 3-caffeoyl-, trans-                   | 1.000 $\pm$ 0.029 | <b>1.144 <math>\pm</math> 0.040</b> | <b>1.438 <math>\pm</math> 0.043</b> | <b>0.742 <math>\pm</math> 0.004</b>  | <b>0.708 <math>\pm</math> 0.015</b>  |
| Saccharic acid                                     | 1.000 $\pm$ 0.041 | 0.902 $\pm$ 0.048                   | 0.936 $\pm$ 0.043                   | 0.866 $\pm$ 0.053                    | 0.752 $\pm$ 0.075                    |
| Succinic acid                                      | 1.000 $\pm$ 0.025 | <b>1.282 <math>\pm</math> 0.052</b> | 0.937 $\pm$ 0.053                   | <b>1.981 <math>\pm</math> 0.079</b>  | <b>3.629 <math>\pm</math> 0.035</b>  |
| Threonic acid                                      | 1.000 $\pm$ 0.105 | 0.943 $\pm$ 0.080                   | 0.779 $\pm$ 0.111                   | <b>1.730 <math>\pm</math> 0.007</b>  | 0.856 $\pm$ 0.030                    |
| <b>Sugars, sugar phosphates and sugar alcohols</b> |                   |                                     |                                     |                                      |                                      |
| Fructose                                           | 1.000 $\pm$ 0.026 | <b>0.865 <math>\pm</math> 0.014</b> | <b>0.714 <math>\pm</math> 0.031</b> | <b>1.171 <math>\pm</math> 0.030</b>  | 1.011 $\pm$ 0.038                    |
| Fructose-6-phosphate                               | 1.000 $\pm$ 0.048 | <b>0.844 <math>\pm</math> 0.013</b> | 1.142 $\pm$ 0.087                   | 1.141 $\pm$ 0.037                    | <b>1.583 <math>\pm</math> 0.052</b>  |
| Fucose                                             | 1.000 $\pm$ 0.057 | 1.205 $\pm$ 0.110                   | 1.187 $\pm$ 0.065                   | <b>1.741 <math>\pm</math> 0.271</b>  | <b>4.433 <math>\pm</math> 0.152</b>  |
| Galactinol                                         | 1.000 $\pm$ 0.015 | <b>1.231 <math>\pm</math> 0.022</b> | 1.245 $\pm$ 0.208                   | <b>2.042 <math>\pm</math> 0.137</b>  | <b>2.230 <math>\pm</math> 0.071</b>  |
| Glucose                                            | 1.000 $\pm$ 0.035 | 0.964 $\pm$ 0.012                   | <b>0.812 <math>\pm</math> 0.033</b> | <b>1.277 <math>\pm</math> 0.044</b>  | 1.064 $\pm$ 0.033                    |
| Glucose-6-phosphate                                | 1.000 $\pm$ 0.040 | <b>0.668 <math>\pm</math> 0.016</b> | 1.061 $\pm$ 0.082                   | <b>1.295 <math>\pm</math> 0.091</b>  | <b>2.438 <math>\pm</math> 0.080</b>  |
| Maltose                                            | 1.000 $\pm$ 0.044 | 1.005 $\pm$ 0.155                   | 1.042 $\pm$ 0.069                   | <b>1.384 <math>\pm</math> 0.141</b>  | <b>1.520 <math>\pm</math> 0.039</b>  |
| Myo-inositol                                       | 1.000 $\pm$ 0.005 | 0.917 $\pm$ 0.005                   | <b>0.824 <math>\pm</math> 0.077</b> | <b>1.930 <math>\pm</math> 0.099</b>  | <b>1.595 <math>\pm</math> 0.042</b>  |
| Raffinose                                          | 1.000 $\pm$ 0.076 | <b>0.460 <math>\pm</math> 0.024</b> | <b>0.619 <math>\pm</math> 0.061</b> | nd                                   | nd                                   |
| Rhamnose                                           | 1.000 $\pm$ 0.039 | 0.937 $\pm$ 0.018                   | 1.123 $\pm$ 0.037                   | <b>1.599 <math>\pm</math> 0.026</b>  | <b>1.402 <math>\pm</math> 0.020</b>  |
| Sucrose                                            | 1.000 $\pm$ 0.044 | <b>0.768 <math>\pm</math> 0.028</b> | <b>0.779 <math>\pm</math> 0.055</b> | <b>1.239 <math>\pm</math> 0.067</b>  | <b>0.776 <math>\pm</math> 0.006</b>  |
| Xylose                                             | 1.000 $\pm$ 0.031 | <b>0.787 <math>\pm</math> 0.011</b> | 0.963 $\pm$ 0.047                   | <b>1.160 <math>\pm</math> 0.021</b>  | <b>1.706 <math>\pm</math> 0.027</b>  |
| <b>Other</b>                                       |                   |                                     |                                     |                                      |                                      |
| Putrescine                                         | 1.000 $\pm$ 0.084 | <b>1.501 <math>\pm</math> 0.018</b> | <b>1.545 <math>\pm</math> 0.217</b> | <b>1.900 <math>\pm</math> 0.165</b>  | <b>3.529 <math>\pm</math> 0.244</b>  |
| Urea                                               | 1.000 $\pm$ 0.137 | 0.762 $\pm$ 0.082                   | 1.706 $\pm$ 0.802                   | 0.972 $\pm$ 0.061                    | 1.371 $\pm$ 0.117                    |

**Table S4. Relative metabolite contents in mature green fruits pericarp of *SIAREB1* transgenic lines.** Data are normalized with respect to the wild type. Values are presented as means  $\pm$  SE (four individual fruits per line). Values in boldface indicate significantly difference from the wild type ( $p \leq 0.05$ ) as determined by t-test. nd, not detected.

|                                                    | WT                | A3                                  | A4                                  | S2                                  | S3                                  |
|----------------------------------------------------|-------------------|-------------------------------------|-------------------------------------|-------------------------------------|-------------------------------------|
| <b>Amino acids</b>                                 |                   |                                     |                                     |                                     |                                     |
| Alanine                                            | 1.000 $\pm$ 0.082 | <b>1.547 <math>\pm</math> 0.177</b> | <b>1.271 <math>\pm</math> 0.038</b> | <b>2.183 <math>\pm</math> 0.061</b> | <b>1.246 <math>\pm</math> 0.014</b> |
| Arginine                                           | 1.000 $\pm$ 0.037 | 0.934 $\pm$ 0.021                   | 0.855 $\pm$ 0.062                   | 0.996 $\pm$ 0.028                   | <b>0.629 <math>\pm</math> 0.010</b> |
| Aspartate                                          | 1.000 $\pm$ 0.089 | <b>1.620 <math>\pm</math> 0.211</b> | 1.059 $\pm$ 0.046                   | <b>3.983 <math>\pm</math> 0.094</b> | <b>2.639 <math>\pm</math> 0.037</b> |
| Alanine, beta                                      | 1.000 $\pm$ 0.105 | <b>1.569 <math>\pm</math> 0.208</b> | <b>1.449 <math>\pm</math> 0.050</b> | <b>7.029 <math>\pm</math> 0.208</b> | <b>5.159 <math>\pm</math> 0.039</b> |
| Phenylalanine                                      | 1.000 $\pm$ 0.236 | <b>2.400 <math>\pm</math> 0.323</b> | <b>1.803 <math>\pm</math> 0.271</b> | <b>2.732 <math>\pm</math> 0.069</b> | <b>5.572 <math>\pm</math> 0.145</b> |
| GABA                                               | 1.000 $\pm$ 0.134 | 1.168 $\pm$ 0.217                   | 0.848 $\pm$ 0.027                   | <b>2.854 <math>\pm</math> 0.071</b> | <b>2.906 <math>\pm</math> 0.027</b> |
| Glutamate                                          | 1.000 $\pm$ 0.124 | <b>1.677 <math>\pm</math> 0.283</b> | 1.248 $\pm$ 0.115                   | <b>2.276 <math>\pm</math> 0.150</b> | <b>2.562 <math>\pm</math> 0.101</b> |
| Glutamine                                          | 1.000 $\pm$ 0.203 | 1.355 $\pm$ 0.270                   | 1.465 $\pm$ 0.226                   | <b>2.703 <math>\pm</math> 0.225</b> | <b>3.172 <math>\pm</math> 0.354</b> |
| Glycine                                            | 1.000 $\pm$ 0.108 | <b>1.803 <math>\pm</math> 0.251</b> | <b>1.413 <math>\pm</math> 0.041</b> | <b>2.778 <math>\pm</math> 0.089</b> | <b>1.882 <math>\pm</math> 0.026</b> |
| Histidine                                          | 1.000 $\pm$ 0.194 | <b>2.368 <math>\pm</math> 0.549</b> | 1.109 $\pm$ 0.129                   | <b>5.393 <math>\pm</math> 0.343</b> | <b>6.579 <math>\pm</math> 0.109</b> |
| Isoleucine                                         | 1.000 $\pm$ 0.098 | <b>2.272 <math>\pm</math> 0.294</b> | <b>1.796 <math>\pm</math> 0.121</b> | <b>4.624 <math>\pm</math> 0.111</b> | <b>6.114 <math>\pm</math> 0.100</b> |
| Methionine                                         | 1.000 $\pm$ 0.179 | 1.542 $\pm$ 0.232                   | 1.350 $\pm$ 0.116                   | <b>2.621 <math>\pm</math> 0.069</b> | <b>1.675 <math>\pm</math> 0.047</b> |
| Pyroglutamic acid                                  | 1.000 $\pm$ 0.092 | <b>1.876 <math>\pm</math> 0.357</b> | <b>1.624 <math>\pm</math> 0.103</b> | <b>2.554 <math>\pm</math> 0.080</b> | <b>3.164 <math>\pm</math> 0.019</b> |
| Proline                                            | 1.000 $\pm$ 0.168 | 1.223 $\pm$ 0.190                   | 0.857 $\pm$ 0.059                   | <b>5.029 <math>\pm</math> 0.228</b> | <b>1.760 <math>\pm</math> 0.041</b> |
| Serine                                             | 1.000 $\pm$ 0.100 | <b>1.271 <math>\pm</math> 0.058</b> | 0.731 $\pm$ 0.160                   | <b>2.924 <math>\pm</math> 0.088</b> | <b>2.768 <math>\pm</math> 0.036</b> |
| Threonine                                          | 1.000 $\pm$ 0.098 | <b>2.344 <math>\pm</math> 0.385</b> | <b>1.379 <math>\pm</math> 0.121</b> | <b>5.187 <math>\pm</math> 0.141</b> | <b>5.812 <math>\pm</math> 0.066</b> |
| Tryptophan                                         | 1.000 $\pm$ 0.207 | <b>1.953 <math>\pm</math> 0.178</b> | 1.431 $\pm$ 0.263                   | <b>2.847 <math>\pm</math> 0.194</b> | <b>7.073 <math>\pm</math> 0.435</b> |
| Valine                                             | 1.000 $\pm$ 0.110 | <b>1.875 <math>\pm</math> 0.235</b> | <b>1.564 <math>\pm</math> 0.049</b> | <b>3.414 <math>\pm</math> 0.145</b> | <b>4.768 <math>\pm</math> 0.151</b> |
| <b>Organic acids</b>                               |                   |                                     |                                     |                                     |                                     |
| Citric acid                                        | 1.000 $\pm$ 0.063 | 1.165 $\pm$ 0.056                   | 1.087 $\pm$ 0.022                   | <b>1.395 <math>\pm</math> 0.041</b> | <b>1.516 <math>\pm</math> 0.020</b> |
| Glyceric acid                                      | 1.009 $\pm$ 0.075 | 1.481 $\pm$ 0.243                   | 1.026 $\pm$ 0.013                   | <b>1.679 <math>\pm</math> 0.073</b> | <b>1.990 <math>\pm</math> 0.089</b> |
| Malic acid                                         | 1.000 $\pm$ 0.051 | 1.201 $\pm$ 0.122                   | <b>1.180 <math>\pm</math> 0.025</b> | <b>1.289 <math>\pm</math> 0.036</b> | 0.836 $\pm$ 0.022                   |
| Phosphoric acid                                    | 1.000 $\pm$ 0.036 | <b>1.418 <math>\pm</math> 0.091</b> | <b>1.269 <math>\pm</math> 0.075</b> | <b>1.904 <math>\pm</math> 0.048</b> | <b>2.070 <math>\pm</math> 0.018</b> |
| Quinic acid, 3-caffeoyl-,<br>cis-                  | 1.000 $\pm$ 0.028 | 0.994 $\pm$ 0.045                   | <b>1.149 <math>\pm</math> 0.035</b> | nd                                  | nd                                  |
| Quinic acid, 3-caffeoyl-,<br>trans-                | 1.000 $\pm$ 0.236 | 1.603 $\pm$ 0.203                   | 1.787 $\pm$ 0.331                   | 0.764 $\pm$ 0.040                   | 0.821 $\pm$ 0.017                   |
| Saccharic acid                                     | 1.000 $\pm$ 0.104 | 1.200 $\pm$ 0.104                   | 0.930 $\pm$ 0.198                   | <b>0.692 <math>\pm</math> 0.037</b> | <b>0.662 <math>\pm</math> 0.027</b> |
| Succinic acid                                      | 1.000 $\pm$ 0.073 | <b>1.472 <math>\pm</math> 0.087</b> | 1.444 $\pm$ 0.311                   | <b>1.647 <math>\pm</math> 0.032</b> | <b>1.460 <math>\pm</math> 0.034</b> |
| Threonic acid                                      | 1.000 $\pm$ 0.129 | 0.998 $\pm$ 0.097                   | 0.897 $\pm$ 0.053                   | <b>2.437 <math>\pm</math> 0.077</b> | <b>1.566 <math>\pm</math> 0.037</b> |
| <b>Sugars, sugar phosphates and sugar alcohols</b> |                   |                                     |                                     |                                     |                                     |
| Fructose                                           | 1.000 $\pm$ 0.023 | <b>0.841 <math>\pm</math> 0.087</b> | <b>0.765 <math>\pm</math> 0.035</b> | 0.885 $\pm$ 0.017                   | <b>0.685 <math>\pm</math> 0.005</b> |
| Fructose-6-phosphate                               | 1.000 $\pm$ 0.037 | 0.961 $\pm$ 0.074                   | 0.975 $\pm$ 0.086                   | <b>1.137 <math>\pm</math> 0.035</b> | <b>1.213 <math>\pm</math> 0.032</b> |
| Fucose                                             | 1.000 $\pm$ 0.061 | <b>1.432 <math>\pm</math> 0.146</b> | 1.122 $\pm$ 0.145                   | <b>1.595 <math>\pm</math> 0.034</b> | <b>2.761 <math>\pm</math> 0.033</b> |
| Glucose                                            | 1.000 $\pm$ 0.034 | 1.020 $\pm$ 0.047                   | 0.923 $\pm$ 0.056                   | 1.006 $\pm$ 0.024                   | <b>0.683 <math>\pm</math> 0.019</b> |
| Glucose-6-phosphate                                | 1.000 $\pm$ 0.052 | 0.858 $\pm$ 0.045                   | 0.840 $\pm$ 0.083                   | 1.081 $\pm$ 0.038                   | 0.993 $\pm$ 0.011                   |
| Maltose                                            | 1.000 $\pm$ 0.063 | 0.849 $\pm$ 0.082                   | <b>0.724 <math>\pm</math> 0.055</b> | 0.866 $\pm$ 0.033                   | 1.059 $\pm$ 0.100                   |
| Myo-inositol                                       | 1.000 $\pm$ 0.045 | 1.048 $\pm$ 0.030                   | 1.055 $\pm$ 0.094                   | <b>2.393 <math>\pm</math> 0.073</b> | 0.845 $\pm$ 0.013                   |
| Raffinose                                          | 1.000 $\pm$ 0.190 | 0.677 $\pm$ 0.029                   | 1.139 $\pm$ 0.010                   | nd                                  | nd                                  |
| Rhamnose                                           | 1.000 $\pm$ 0.058 | 1.035 $\pm$ 0.033                   | 0.980 $\pm$ 0.068                   | 1.105 $\pm$ 0.025                   | 1.085 $\pm$ 0.011                   |
| Sucrose                                            | 1.000 $\pm$ 0.051 | <b>0.579 <math>\pm</math> 0.037</b> | 0.731 $\pm$ 0.197                   | 0.963 $\pm$ 0.051                   | <b>0.488 <math>\pm</math> 0.020</b> |
| Xylose                                             | 1.000 $\pm$ 0.072 | 0.831 $\pm$ 0.017                   | 0.916 $\pm$ 0.060                   | 0.909 $\pm$ 0.027                   | <b>1.842 <math>\pm</math> 0.052</b> |
| <b>Other</b>                                       |                   |                                     |                                     |                                     |                                     |
| Putrescine                                         | 1.000 $\pm$ 0.087 | 1.150 $\pm$ 0.089                   | 0.807 $\pm$ 0.054                   | 1.140 $\pm$ 0.119                   | <b>1.363 <math>\pm</math> 0.038</b> |
| Urea                                               | 1.000 $\pm$ 0.100 | 1.100 $\pm$ 0.129                   | 0.772 $\pm$ 0.018                   | 0.903 $\pm$ 0.057                   | 1.287 $\pm$ 0.371                   |

**Table S5. Relative metabolite contents in ripe red fruits pericarp of *SIAREB1* transgenic lines.**

Data are normalized with respect to the wild type. Values are presented as means  $\pm$  SE (four individual fruits per line). Values in boldface indicate significantly difference from the wild type ( $p \leq 0.05$ ) as determined by t-test. nd, not detected.

|                                                    | WT                | A3                                  | A4                                  | S2                                   | S3                                   |
|----------------------------------------------------|-------------------|-------------------------------------|-------------------------------------|--------------------------------------|--------------------------------------|
| <b>Amino acids</b>                                 |                   |                                     |                                     |                                      |                                      |
| Alanine                                            | 1.000 $\pm$ 0.166 | <b>1.708 <math>\pm</math> 0.152</b> | 0.727 $\pm$ 0.237                   | <b>1.348 <math>\pm</math> 0.088</b>  | 0.753 $\pm$ 0.110                    |
| Aspartate                                          | 1.000 $\pm$ 0.078 | <b>0.387 <math>\pm</math> 0.098</b> | <b>0.427 <math>\pm</math> 0.113</b> | <b>2.520 <math>\pm</math> 0.158</b>  | <b>1.975 <math>\pm</math> 0.062</b>  |
| Alanine, beta                                      | 1.000 $\pm$ 0.152 | 1.228 $\pm$ 0.202                   | 0.604 $\pm$ 0.137                   | <b>12.651 <math>\pm</math> 1.605</b> | <b>4.230 <math>\pm</math> 0.297</b>  |
| GABA                                               | 1.000 $\pm$ 0.045 | 0.996 $\pm$ 0.206                   | <b>0.460 <math>\pm</math> 0.139</b> | <b>7.477 <math>\pm</math> 0.554</b>  | <b>5.811 <math>\pm</math> 0.460</b>  |
| Glutamate                                          | 1.000 $\pm$ 0.132 | <b>0.232 <math>\pm</math> 0.066</b> | <b>0.293 <math>\pm</math> 0.088</b> | <b>2.119 <math>\pm</math> 0.204</b>  | <b>2.381 <math>\pm</math> 0.149</b>  |
| Glutamine                                          | 1.000 $\pm$ 0.127 | <b>0.363 <math>\pm</math> 0.117</b> | 0.966 $\pm$ 0.522                   | <b>4.306 <math>\pm</math> 0.866</b>  | <b>3.929 <math>\pm</math> 0.596</b>  |
| Glycine                                            | 1.000 $\pm$ 0.092 | 1.186 $\pm$ 0.281                   | 0.792 $\pm$ 0.194                   | <b>4.556 <math>\pm</math> 0.668</b>  | <b>1.849 <math>\pm</math> 0.214</b>  |
| Histidine                                          | 1.000 $\pm$ 0.071 | <b>0.578 <math>\pm</math> 0.065</b> | <b>0.558 <math>\pm</math> 0.041</b> | <b>6.744 <math>\pm</math> 1.275</b>  | <b>5.263 <math>\pm</math> 0.388</b>  |
| Isoleucine                                         | 1.000 $\pm$ 0.117 | 0.978 $\pm$ 0.258                   | 1.221 $\pm$ 0.020                   | <b>6.321 <math>\pm</math> 0.840</b>  | <b>4.824 <math>\pm</math> 0.388</b>  |
| Methionine                                         | 1.000 $\pm$ 0.045 | <b>0.510 <math>\pm</math> 0.117</b> | 0.673 $\pm$ 0.167                   | <b>2.351 <math>\pm</math> 0.235</b>  | 1.156 $\pm$ 0.145                    |
| Phenylalanine                                      | 1.000 $\pm$ 0.140 | 0.628 $\pm$ 0.155                   | 0.973 $\pm$ 0.190                   | <b>4.124 <math>\pm</math> 0.502</b>  | <b>10.473 <math>\pm</math> 0.392</b> |
| Pyroglutamic acid                                  | 1.000 $\pm$ 0.090 | <b>0.517 <math>\pm</math> 0.083</b> | <b>0.727 <math>\pm</math> 0.066</b> | <b>2.739 <math>\pm</math> 0.191</b>  | <b>3.345 <math>\pm</math> 0.361</b>  |
| Proline                                            | 1.000 $\pm$ 0.153 | 1.273 $\pm$ 0.288                   | 0.723 $\pm$ 0.043                   | <b>4.501 <math>\pm</math> 0.437</b>  | 0.855 $\pm$ 0.085                    |
| Serine                                             | 1.000 $\pm$ 0.098 | 1.256 $\pm$ 0.159                   | 1.001 $\pm$ 0.019                   | <b>5.074 <math>\pm</math> 0.526</b>  | <b>1.827 <math>\pm</math> 0.120</b>  |
| Treonine                                           | 1.000 $\pm$ 0.066 | 0.865 $\pm$ 0.185                   | 0.783 $\pm$ 0.192                   | <b>6.115 <math>\pm</math> 0.596</b>  | <b>4.320 <math>\pm</math> 0.213</b>  |
| Tryptophan                                         | 1.000 $\pm$ 0.148 | 0.998 $\pm$ 0.279                   | 0.983 $\pm$ 0.248                   | <b>4.977 <math>\pm</math> 0.433</b>  | <b>8.775 <math>\pm</math> 1.400</b>  |
| Valine                                             | 1.000 $\pm$ 0.119 | 1.190 $\pm$ 0.316                   | 0.972 $\pm$ 0.271                   | <b>4.361 <math>\pm</math> 0.788</b>  | <b>2.327 <math>\pm</math> 0.206</b>  |
| <b>Organic acids</b>                               |                   |                                     |                                     |                                      |                                      |
| Citric acid                                        | 1.000 $\pm$ 0.130 | 1.271 $\pm$ 0.044                   | 1.142 $\pm$ 0.082                   | <b>2.177 <math>\pm</math> 0.106</b>  | <b>1.705 <math>\pm</math> 0.057</b>  |
| Glyceric acid                                      | 1.000 $\pm$ 0.272 | 1.420 $\pm$ 0.145                   | 0.884 $\pm$ 0.058                   | <b>0.532 <math>\pm</math> 0.049</b>  | <b>0.590 <math>\pm</math> 0.016</b>  |
| Malic acid                                         | 1.000 $\pm$ 0.066 | 0.954 $\pm$ 0.013                   | 1.073 $\pm$ 0.062                   | <b>1.812 <math>\pm</math> 0.122</b>  | 1.162 $\pm$ 0.215                    |
| Phosphoric acid                                    | 1.000 $\pm$ 0.036 | <b>0.825 <math>\pm</math> 0.017</b> | 0.927 $\pm$ 0.018                   | <b>1.457 <math>\pm</math> 0.072</b>  | <b>1.435 <math>\pm</math> 0.022</b>  |
| Quinic acid, 3-caffeoyl-, trans-                   | 1.000 $\pm$ 0.082 | <b>3.215 <math>\pm</math> 0.130</b> | <b>1.807 <math>\pm</math> 0.247</b> | 0.908 $\pm$ 0.028                    | <b>1.345 <math>\pm</math> 0.031</b>  |
| Saccharic acid                                     | 1.000 $\pm$ 0.091 | 0.854 $\pm$ 0.089                   | <b>1.381 <math>\pm</math> 0.120</b> | <b>1.307 <math>\pm</math> 0.012</b>  | 1.525 $\pm$ 0.347                    |
| Succinic acid                                      | 1.000 $\pm$ 0.211 | <b>2.643 <math>\pm</math> 0.686</b> | 1.114 $\pm$ 0.079                   | 1.022 $\pm$ 0.069                    | 1.547 $\pm$ 0.145                    |
| Threonic acid                                      | 1.000 $\pm$ 0.087 | <b>0.391 <math>\pm</math> 0.074</b> | <b>0.430 <math>\pm</math> 0.081</b> | <b>3.004 <math>\pm</math> 0.262</b>  | <b>2.275 <math>\pm</math> 0.095</b>  |
| <b>Sugars, sugar phosphates and sugar alcohols</b> |                   |                                     |                                     |                                      |                                      |
| Erythritol                                         | 1.000 $\pm$ 0.060 | 0.959 $\pm$ 0.045                   | 0.860 $\pm$ 0.031                   | <b>1.868 <math>\pm</math> 0.147</b>  | <b>1.286 <math>\pm</math> 0.064</b>  |
| Fructose                                           | 1.000 $\pm$ 0.008 | <b>0.822 <math>\pm</math> 0.043</b> | <b>0.811 <math>\pm</math> 0.026</b> | <b>1.156 <math>\pm</math> 0.031</b>  | <b>0.837 <math>\pm</math> 0.046</b>  |
| Fructose-6-phosphate                               | 1.000 $\pm$ 0.061 | 1.334 $\pm$ 0.140                   | 0.980 $\pm$ 0.048                   | <b>1.649 <math>\pm</math> 0.073</b>  | <b>1.503 <math>\pm</math> 0.186</b>  |
| Fucose                                             | 1.000 $\pm$ 0.047 | 0.828 $\pm$ 0.081                   | 0.946 $\pm$ 0.015                   | <b>1.707 <math>\pm</math> 0.238</b>  | <b>2.308 <math>\pm</math> 0.185</b>  |
| Galactinol                                         | 1.000 $\pm$ 0.001 | 2.071 $\pm$ 0.681                   | <b>0.300 <math>\pm</math> 0.016</b> | nd                                   | nd                                   |
| Glucose                                            | 1.000 $\pm$ 0.028 | <b>1.105 <math>\pm</math> 0.009</b> | <b>0.898 <math>\pm</math> 0.026</b> | <b>1.291 <math>\pm</math> 0.004</b>  | 0.954 $\pm$ 0.015                    |
| Glucose-6-phosphate                                | 1.000 $\pm$ 0.050 | 1.251 $\pm$ 0.190                   | 0.803 $\pm$ 0.047                   | <b>1.617 <math>\pm</math> 0.111</b>  | <b>1.378 <math>\pm</math> 0.270</b>  |
| Maltose                                            | 1.000 $\pm$ 0.205 | <b>3.529 <math>\pm</math> 0.191</b> | 0.706 $\pm$ 0.064                   | <b>1.416 <math>\pm</math> 0.122</b>  | <b>0.488 <math>\pm</math> 0.033</b>  |
| Myo-inositol                                       | 1.000 $\pm$ 0.060 | 0.998 $\pm$ 0.194                   | <b>0.493 <math>\pm</math> 0.036</b> | <b>2.176 <math>\pm</math> 0.102</b>  | 1.012 $\pm$ 0.012                    |
| Rhamnose                                           | 1.000 $\pm$ 0.039 | 0.862 $\pm$ 0.048                   | <b>0.829 <math>\pm</math> 0.043</b> | <b>1.145 <math>\pm</math> 0.028</b>  | <b>1.275 <math>\pm</math> 0.065</b>  |
| Sucrose                                            | 1.000 $\pm$ 0.159 | 0.657 $\pm$ 0.041                   | <b>0.466 <math>\pm</math> 0.068</b> | <b>0.592 <math>\pm</math> 0.015</b>  | 1.279 $\pm$ 0.200                    |
| Trehalose                                          | 1.000 $\pm$ 0.039 | <b>1.483 <math>\pm</math> 0.035</b> | 0.946 $\pm$ 0.063                   | <b>1.777 <math>\pm</math> 0.273</b>  | 0.914 $\pm$ 0.052                    |
| Xylose                                             | 1.000 $\pm$ 0.046 | <b>0.870 <math>\pm</math> 0.026</b> | 0.898 $\pm$ 0.037                   | 0.917 $\pm$ 0.045                    | <b>1.749 <math>\pm</math> 0.054</b>  |
| <b>Other</b>                                       |                   |                                     |                                     |                                      |                                      |
| Putrescine                                         | 1.000 $\pm$ 0.105 | <b>1.698 <math>\pm</math> 0.413</b> | 1.390 $\pm$ 0.314                   | <b>1.467 <math>\pm</math> 0.138</b>  | 1.200 $\pm$ 0.091                    |
| Urea                                               | 1.000 $\pm$ 0.119 | 0.773 $\pm$ 0.037                   | 0.735 $\pm$ 0.066                   | 0.848 $\pm$ 0.025                    | 0.899 $\pm$ 0.072                    |

**Table S6. Comparison of metabolite content between genotypes and developmental stages using a two-way analysis of variance.** Five levels for the genotype factor (wild type, two antisense lines and two OE lines) and three levels for the development factor (IG, MG, RR) were considered. Significant effects are highlighted in red ( $p \leq 0.05$ ). Df, degrees of freedom; MS, mean squares.

| Metabolite    | Effect      | df     | MS         | df    | MS       | F value | p-value |   |
|---------------|-------------|--------|------------|-------|----------|---------|---------|---|
|               |             | Effect | Effect     | Error | Error    |         |         |   |
| Alanine       | Genotype    | 4      | 28.367     | 47    | 0.324    | 87.609  | 0.00000 | * |
|               | Development | 2      | 65.862     | 47    | 0.324    | 203.409 | 0.00000 | * |
|               | Interaction | 8      | 20.714     | 47    | 0.324    | 63.974  | 0.00000 | * |
| Alanine, beta | Genotype    | 4      | 1.395      | 47    | 0.005    | 289.215 | 0.00000 | * |
|               | Development | 2      | 0.725      | 47    | 0.005    | 150.292 | 0.00000 | * |
|               | Interaction | 8      | 0.171      | 47    | 0.005    | 35.513  | 0.00000 | * |
| Arginine      | Genotype    | 4      | 0.056      | 34    | 0.002    | 31.627  | 0.00000 | * |
|               | Development | 2      | 0.075      | 34    | 0.002    | 42.305  | 0.00000 | * |
|               | Interaction | 8      | 0.019      | 34    | 0.002    | 10.563  | 0.00000 | * |
| Aspartate     | Genotype    | 4      | 290.386    | 47    | 1.703    | 170.491 | 0.00000 | * |
|               | Development | 2      | 482.207    | 47    | 1.703    | 283.112 | 0.00000 | * |
|               | Interaction | 8      | 78.257     | 47    | 1.703    | 45.946  | 0.00000 | * |
| GABA          | Genotype    | 4      | 136.478    | 47    | 0.733    | 186.195 | 0.00000 | * |
|               | Development | 2      | 32.497     | 47    | 0.733    | 44.336  | 0.00000 | * |
|               | Interaction | 8      | 3.651      | 47    | 0.733    | 4.981   | 0.00000 | * |
| Citric acid   | Genotype    | 4      | 28826.620  | 47    | 258.964  | 111.315 | 0.00000 | * |
|               | Development | 2      | 39899.960  | 47    | 258.964  | 154.075 | 0.00000 | * |
|               | Interaction | 8      | 3889.340   | 47    | 258.964  | 15.019  | 0.00000 | * |
| Fructose      | Genotype    | 4      | 62437.816  | 47    | 1701.038 | 36.706  | 0.00000 | * |
|               | Development | 2      | 100157.972 | 47    | 1701.038 | 58.880  | 0.00000 | * |
|               | Interaction | 8      | 12070.031  | 47    | 1701.038 | 7.096   | 0.00000 | * |
| Fructose-6-P  | Genotype    | 4      | 0.000      | 47    | 0.000    | 14.971  | 0.00000 | * |
|               | Development | 2      | 0.000      | 47    | 0.000    | 6.926   | 0.00200 | * |
|               | Interaction | 8      | 0.000      | 47    | 0.000    | 3.609   | 0.00200 | * |
| Fucose        | Genotype    | 4      | 0.126      | 47    | 0.001    | 157.763 | 0.00000 | * |
|               | Development | 2      | 0.004      | 47    | 0.001    | 4.994   | 0.01100 | * |
|               | Interaction | 8      | 0.007      | 47    | 0.001    | 8.681   | 0.00000 | * |
| Glucose       | Genotype    | 4      | 52637.006  | 47    | 1003.866 | 52.434  | 0.00000 | * |
|               | Development | 2      | 85832.700  | 47    | 1003.866 | 85.502  | 0.00000 | * |
|               | Interaction | 8      | 13630.500  | 47    | 1003.866 | 13.578  | 0.00000 | * |
| Glucose-6-P   | Genotype    | 4      | 0.003      | 47    | 0.000    | 27.985  | 0.00000 | * |
|               | Development | 2      | 0.004      | 47    | 0.000    | 30.946  | 0.00000 | * |
|               | Interaction | 8      | 0.002      | 47    | 0.000    | 16.756  | 0.00000 | * |
| Glutamate     | Genotype    | 4      | 0.932      | 47    | 0.015    | 61.932  | 0.00000 | * |
|               | Development | 2      | 4.736      | 47    | 0.015    | 314.626 | 0.00000 | * |
|               | Interaction | 8      | 0.803      | 47    | 0.015    | 53.37   | 0.00000 | * |
| Glutamine     | Genotype    | 4      | 1.756      | 47    | 0.044    | 39.84   | 0.00000 | * |
|               | Development | 2      | 0.177      | 47    | 0.044    | 4.027   | 0.02400 | * |
|               | Interaction | 8      | 0.042      | 47    | 0.044    | 0.959   | 0.47900 |   |
| Glyceric acid | Genotype    | 4      | 0.002      | 47    | 0.000    | 6.232   | 0.00000 | * |
|               | Development | 2      | 0.015      | 47    | 0.000    | 49.379  | 0.00000 | * |
|               | Interaction | 8      | 0.005      | 47    | 0.000    | 17.949  | 0.00000 | * |
| Glycine       | Genotype    | 4      | 3.751      | 47    | 0.059    | 63.743  | 0.00000 | * |
|               | Development | 2      | 4.453      | 47    | 0.059    | 75.662  | 0.00000 | * |
|               | Interaction | 8      | 1.584      | 47    | 0.059    | 26.921  | 0.00000 | * |
| Histidine     | Genotype    | 4      | 0.280      | 44    | 0.002    | 135.938 | 0.00000 | * |
|               | Development | 2      | 0.094      | 44    | 0.002    | 45.758  | 0.00000 | * |
|               | Interaction | 8      | 0.032      | 44    | 0.002    | 15.313  | 0.00000 | * |
| Myo-inositol  | Genotype    | 4      | 32.080     | 47    | 0.230    | 139.478 | 0.00000 | * |
|               | Development | 2      | 58.742     | 47    | 0.230    | 255.396 | 0.00000 | * |
|               | Interaction | 8      | 4.145      | 47    | 0.230    | 18.023  | 0.00000 | * |
| Isoleucine    | Genotype    | 4      | 37.816     | 47    | 0.164    | 230.163 | 0.00000 | * |

|                   |             |   |           |    |         |         |         |   |
|-------------------|-------------|---|-----------|----|---------|---------|---------|---|
|                   | Development | 2 | 4.932     | 47 | 0.164   | 30.017  | 0.00000 | * |
|                   | Interaction | 8 | 2.297     | 47 | 0.164   | 13.980  | 0.00000 | * |
| Malate            | Genotype    | 4 | 722.748   | 47 | 42.371  | 17.058  | 0.00000 | * |
|                   | Development | 2 | 5660.194  | 47 | 42.371  | 133.586 | 0.00000 | * |
|                   | Interaction | 8 | 304.552   | 47 | 42.371  | 7.188   | 0.00000 | * |
| Maltose           | Genotype    | 4 | 0.009     | 47 | 0.000   | 79.736  | 0.00000 | * |
|                   | Development | 2 | 0.036     | 47 | 0.000   | 320.149 | 0.00000 | * |
|                   | Interaction | 8 | 0.010     | 47 | 0.000   | 89.898  | 0.00000 | * |
| Methionine        | Genotype    | 4 | 0.114     | 47 | 0.002   | 45.941  | 0.00000 | * |
|                   | Development | 2 | 0.045     | 47 | 0.002   | 17.994  | 0.00000 | * |
|                   | Interaction | 8 | 0.033     | 47 | 0.002   | 13.232  | 0.00000 | * |
| Phenylalanine     | Genotype    | 4 | 43.159    | 47 | 0.108   | 400.117 | 0.00000 | * |
|                   | Development | 2 | 4.064     | 47 | 0.108   | 37.675  | 0.00000 | * |
|                   | Interaction | 8 | 0.709     | 47 | 0.108   | 6.568   | 0.00000 | * |
| Phosphoric acid   | Genotype    | 4 | 405.464   | 47 | 1.803   | 224.853 | 0.00000 | * |
|                   | Development | 2 | 2.624     | 47 | 1.803   | 1.455   | 0.24400 |   |
|                   | Interaction | 8 | 18.875    | 47 | 1.803   | 10.467  | 0.00000 | * |
| Proline           | Genotype    | 4 | 3.045     | 47 | 0.030   | 100.891 | 0.00000 | * |
|                   | Development | 2 | 0.861     | 47 | 0.030   | 28.534  | 0.00000 | * |
|                   | Interaction | 8 | 1.032     | 47 | 0.030   | 34.185  | 0.00000 | * |
| Putrescine        | Genotype    | 4 | 0.002     | 47 | 0.000   | 5.024   | 0.00200 | * |
|                   | Development | 2 | 0.008     | 47 | 0.000   | 17.936  | 0.00000 | * |
|                   | Interaction | 8 | 0.001     | 47 | 0.000   | 3.094   | 0.00700 | * |
| Pyroglutamic acid | Genotype    | 4 | 27643.465 | 47 | 328.044 | 84.267  | 0.00000 | * |
|                   | Development | 2 | 5216.007  | 47 | 328.044 | 15.900  | 0.00000 | * |
|                   | Interaction | 8 | 3283.121  | 47 | 328.044 | 10.008  | 0.00000 | * |
| Rhamnose          | Genotype    | 4 | 0.007     | 47 | 0.000   | 20.314  | 0.00000 | * |
|                   | Development | 2 | 0.172     | 47 | 0.000   | 469.373 | 0.00000 | * |
|                   | Interaction | 8 | 0.003     | 47 | 0.000   | 7.851   | 0.00000 | * |
| Saccharic acid    | Genotype    | 4 | 0.000     | 47 | 0.000   | 0.351   | 0.84200 |   |
|                   | Development | 2 | 0.000     | 47 | 0.000   | 4.675   | 0.01400 | * |
|                   | Interaction | 8 | 0.000     | 47 | 0.000   | 2.832   | 0.01200 | * |
| Serine            | Genotype    | 4 | 147.692   | 47 | 0.618   | 238.939 | 0.00000 | * |
|                   | Development | 2 | 29.219    | 47 | 0.618   | 47.272  | 0.00000 | * |
|                   | Interaction | 8 | 12.645    | 47 | 0.618   | 20.457  | 0.00000 | * |
| Succinate         | Genotype    | 4 | 0.010     | 47 | 0.001   | 17.533  | 0.00000 | * |
|                   | Development | 2 | 0.021     | 47 | 0.001   | 38.389  | 0.00000 | * |
|                   | Interaction | 8 | 0.008     | 47 | 0.001   | 15.075  | 0.00000 | * |
| Sucrose           | Genotype    | 4 | 4.902     | 47 | 0.628   | 7.811   | 0.00000 | * |
|                   | Development | 2 | 28.956    | 47 | 0.628   | 46.145  | 0.00000 | * |
|                   | Interaction | 8 | 3.570     | 47 | 0.628   | 5.689   | 0.00000 | * |
| Threonate         | Genotype    | 4 | 0.042     | 47 | 0.000   | 137.238 | 0.00000 | * |
|                   | Development | 2 | 0.053     | 47 | 0.000   | 173.183 | 0.00000 | * |
|                   | Interaction | 8 | 0.016     | 47 | 0.000   | 52.085  | 0.00000 | * |
| Threonine         | Genotype    | 4 | 10.901    | 47 | 0.034   | 323.868 | 0.00000 | * |
|                   | Development | 2 | 0.772     | 47 | 0.034   | 22.937  | 0.00000 | * |
|                   | Interaction | 8 | 0.257     | 47 | 0.034   | 7.628   | 0.00000 | * |
| Tryptophan        | Genotype    | 4 | 0.225     | 47 | 0.003   | 84.257  | 0.00000 | * |
|                   | Development | 2 | 0.004     | 47 | 0.003   | 1.514   | 0.23100 |   |
|                   | Interaction | 8 | 0.005     | 47 | 0.003   | 1.827   | 0.09600 |   |
| Urea              | Genotype    | 4 | 0.001     | 47 | 0.001   | 0.791   | 0.53700 |   |
|                   | Development | 2 | 0.003     | 47 | 0.001   | 3.576   | 0.03600 | * |
|                   | Interaction | 8 | 0.001     | 47 | 0.001   | 1.213   | 0.31200 |   |
| Valine            | Genotype    | 4 | 73.881    | 47 | 0.470   | 157.256 | 0.00000 | * |
|                   | Development | 2 | 76.520    | 47 | 0.470   | 162.873 | 0.00000 | * |
|                   | Interaction | 8 | 15.680    | 47 | 0.470   | 33.375  | 0.00000 | * |
| Xylose            | Genotype    | 4 | 0.316     | 47 | 0.003   | 161.807 | 0.00000 | * |
|                   | Development | 2 | 1.082     | 47 | 0.003   | 554.015 | 0.00000 | * |
|                   | Interaction | 8 | 0.035     | 47 | 0.003   | 17.674  | 0.00000 | * |



**Table S7. Identification of statistically different secondary metabolites in SIAREB1 transgenic tomato fruit pericarp with respect to wild type fruit pericarp ( $p \leq 0.01$ ).** Compounds were determined by non-targeted metabolic profiling (LC-ESI-MS) in tomato fruit pericarp. The identification of the chemical formula and putative metabolite was performed by the program "Seven Golden Rules" and combining literature survey and tomato metabolite databases such as MoToDB. m/z: mass/charge of putative metabolite, rt: retention time, [M]: molecular mass, ESI-: negative electrospray

| m/z      | Aduct          | rt (min) | [M] ESI- (Da) | Proposed formula                                | Proposed [M] (Da) | Deviation (mDa) | Metabolite                             |
|----------|----------------|----------|---------------|-------------------------------------------------|-------------------|-----------------|----------------------------------------|
| 224.0664 | [M+H-CH4S]+    | 19.0224  | 271.0616      | C <sub>15</sub> H <sub>12</sub> O <sub>5</sub>  | 271.0612          | 0.41            | Naringenin / Naringenin chalcone       |
| 289.0951 | [M+NH4]+       | 18.9822  | 271.0616      | C <sub>15</sub> H <sub>12</sub> O <sub>5</sub>  | 271.0617          | -0.09           | Naringenin / Naringenin chalcone       |
| 303.0554 | [M+H-C6H10O5]+ | 15.3606  | 464.1009      | C <sub>21</sub> H <sub>20</sub> O <sub>12</sub> | 464.0955          | 5.39            | Isoquercitrin / Miricitrin (Miricetin) |
| 303.0573 | [M+H-C6H10O5]+ | 14.5239  | 464.1007      | C <sub>21</sub> H <sub>20</sub> O <sub>12</sub> | 464.0955          | 5.20            | Isoquercitrin / Miricitrin (Miricetin) |
| 386.1539 | [M+NH4]+       | 23.8236  | 368.1222      | C <sub>17</sub> H <sub>20</sub> O <sub>9</sub>  | 368.1107          | 11.50           | Feruloylquinic acid                    |
| 449.1268 | [M+H-C6H10O4]+ | 15.3277  | 594.1808      | C <sub>27</sub> H <sub>30</sub> O <sub>15</sub> | 594.1585          | 22.33           | Kaempferol-3-O-rutinoside              |
| 449.1204 | [M+H]+         | 16.546   | 448.1100      | C <sub>21</sub> H <sub>20</sub> O <sub>11</sub> | 448.1006          | 9.39            | Astragalin                             |
| 465.1064 | [M+H]+         | 14.5037  | 464.1007      | C <sub>21</sub> H <sub>20</sub> O <sub>12</sub> | 464.0955          | 5.20            | Isoquercitrin / Miricitrin             |
| 465.1087 | [M+H]+         | 15.3607  | 464.1009      | C <sub>21</sub> H <sub>20</sub> O <sub>13</sub> | 464.0955          | 5.39            | Isoquercitrin / Miricitrin             |
| 595.1722 | [M+H]+         | 15.3492  | 594.1682      | C <sub>27</sub> H <sub>30</sub> O <sub>15</sub> | 594.1585          | 9.74            | Kaempferol-3-O-rutinoside              |
| 611.1646 | [M+H]+         | 15.3456  | 610.1583      | C <sub>27</sub> H <sub>30</sub> O <sub>16</sub> | 610.1534          | 4.87            | Rutin / Kaempferol-3,7-di-O-glucoside  |
| 611.1681 | [M+H]+         | 14.5164  | 610.1586      | C <sub>27</sub> H <sub>30</sub> O <sub>16</sub> | 610.1534          | 5.23            | Rutin / Kaempferol-3,7-di-O-glucoside  |
| 731.1996 | [2M+Na]+       | 9.7196   | 354.1028      | C <sub>16</sub> H <sub>18</sub> O <sub>9</sub>  | 354.0951          | 7.73            | Chlorogenic acid                       |

**Table S8. Relative content of identified secondary metabolites in fruits of *SIAREB1* transgenic lines.** Content of compounds identified in Table S8 and as described in Materials and Methods was normalized with respect to the wild type. Values are presented as means  $\pm$  SE (three individual fruits per line). Values in boldface indicate significantly difference from the wild type ( $p \leq 0.05$ ) as determined by ANOVA and t-test.

| <b>Metabolite</b>                     | <b>Stage</b> | <b>WT</b>         | <b>S2</b>                           | <b>S3</b>                           |
|---------------------------------------|--------------|-------------------|-------------------------------------|-------------------------------------|
| Naringenin / Naringenin chalcone      | IG           | 1.000 $\pm$ 0.067 | <b>1.567 <math>\pm</math> 0.060</b> | <b>1.627 <math>\pm</math> 0.023</b> |
| Feruloylquinic acid                   | IG           | 1.000 $\pm$ 0.012 | <b>1.661 <math>\pm</math> 0.034</b> | <b>1.493 <math>\pm</math> 0.069</b> |
| Kaempferol-3-O-rutinoside             | RR           | 1.000 $\pm$ 0.015 | <b>0.727 <math>\pm</math> 0.033</b> | <b>0.652 <math>\pm</math> 0.010</b> |
| Isoquercitrin / Miricitrin            | RR           | 1.000 $\pm$ 0.047 | <b>0.364 <math>\pm</math> 0.047</b> | <b>0.402 <math>\pm</math> 0.003</b> |
| Rutin / Kaempferol-3,7-di-O-glucoside | RR           | 1.000 $\pm$ 0.057 | <b>0.383 <math>\pm</math> 0.017</b> | <b>0.321 <math>\pm</math> 0.014</b> |
| Chlorogenic acid                      | IG           | 1.000 $\pm$ 0.054 | <b>1.653 <math>\pm</math> 0.072</b> | <b>2.145 <math>\pm</math> 0.080</b> |
| Chlorogenic acid                      | MG           | 1.000 $\pm$ 0.038 | <b>0.482 <math>\pm</math> 0.056</b> | <b>0.619 <math>\pm</math> 0.061</b> |
| Chlorogenic acid                      | RR           | 1.000 $\pm$ 0.034 | <b>0.446 <math>\pm</math> 0.018</b> | <b>0.654 <math>\pm</math> 0.030</b> |
|                                       |              |                   |                                     |                                     |
| <b>Metabolite</b>                     | <b>Stage</b> | <b>WT</b>         | <b>A3</b>                           | <b>A4</b>                           |
| Astragalin                            | MG           | 1.000 $\pm$ 0.084 | <b>1.418 <math>\pm</math> 0.060</b> | <b>1.746 <math>\pm</math> 0.149</b> |

**Table S9. Changes in analyte content in red ripe fruits and leaves in the S2 over-expressor line compared to WT.** Significant changes ( $p < 0.05$ ) of more than 30% are highlighted in red (up-regulated) or blue (down-regulated)

| Analyte                          | MATURE RED FRUIT S2 / WT |       | LEAF S2 / WT |       |
|----------------------------------|--------------------------|-------|--------------|-------|
|                                  | mean                     | s.e.  | mean         | s.e.  |
| Alanine                          | 1.347                    | 0.088 | 1.014        | 0.120 |
| Alanine, beta-                   | 12.646                   | 1.605 | 1.231        | 0.087 |
| Arginine                         | 1.474                    | 0.100 | 2.185        | 0.292 |
| Aspartic acid,                   | 2.520                    | 0.158 | 0.885        | 0.105 |
| Citric acid                      | 2.180                    | 0.106 | 0.786        | 0.086 |
| Fructose                         | 1.156                    | 0.031 | 0.690        | 0.010 |
| Fructose-6-P                     | 1.649                    | 0.073 | 1.391        | 0.092 |
| Fucose                           | 1.710                    | 0.295 | 0.800        | 0.041 |
| GABA                             | 7.477                    | 0.544 | 1.095        | 0.116 |
| Glucose                          | 1.292                    | 0.040 | 0.350        | 0.005 |
| Glucose-6-P                      | 1.617                    | 0.111 | 1.155        | 0.096 |
| Glutamic acid                    | 2.119                    | 0.204 | 0.802        | 0.122 |
| Glutamine                        | 4.305                    | 0.866 | 1.013        | 0.155 |
| Glycine                          | 4.555                    | 0.668 | 0.890        | 0.181 |
| Histidine                        | 6.744                    | 1.275 | 0.951        | 0.087 |
| Inositol, myo-                   | 2.176                    | 0.102 | 1.402        | 0.137 |
| Isoleucine                       | 6.321                    | 0.840 | 1.348        | 0.153 |
| Malic acid                       | 1.812                    | 0.122 | 0.390        | 0.038 |
| Maltose                          | 1.416                    | 0.126 | 0.982        | 0.098 |
| Methionine                       | 2.351                    | 0.235 | 0.961        | 0.138 |
| Phenylalanine                    | 4.124                    | 0.502 | 1.344        | 0.072 |
| Phosphoric acid                  | 1.458                    | 0.072 | 2.388        | 0.342 |
| Proline                          | 4.501                    | 0.437 | 2.263        | 0.229 |
| Putrescine                       | 1.467                    | 0.138 | 0.732        | 0.111 |
| Pyroglutamic acid                | 2.739                    | 0.191 | 1.195        | 0.110 |
| Quinic acid, 3-caffeoyl-, trans- | 0.908                    | 0.028 | 1.133        | 0.072 |
| Rhamnose, DL-                    | 1.145                    | 0.028 | 1.242        | 0.037 |
| Saccharic acid                   | 1.307                    | 0.012 | 1.796        | 0.359 |
| Serine                           | 5.074                    | 0.526 | 0.973        | 0.128 |
| succinate                        | 1.021                    | 0.069 | 1.241        | 0.121 |
| Sucrose                          | 0.595                    | 0.015 | 1.195        | 0.135 |
| threonate                        | 3.004                    | 0.262 | 1.133        | 0.095 |
| threonine                        | 6.112                    | 0.596 | 1.874        | 0.088 |
| Tryptophan                       | 4.977                    | 0.433 | 1.027        | 0.086 |
| Urea                             | 0.848                    | 0.025 | 1.926        | 0.083 |
| Valine                           | 4.357                    | 0.788 | 1.105        | 0.123 |

**Table S10. Presence of ABA-response elements (ABREs) in the promoters of tomato genes associated to carbon and amino acid metabolism.** The analysis was performed using the PLACE database (<http://www.dna.affrc.go.jp/PLACE/index.html>).

| Enzyme                                                                                        | Gene Abbreviation | Pathway*        | Tomato ID                                                                                                                                | Nº of ABREs                               |
|-----------------------------------------------------------------------------------------------|-------------------|-----------------|------------------------------------------------------------------------------------------------------------------------------------------|-------------------------------------------|
| 3-Isopropylmalate dehydrogenase                                                               | IDM               | Leu (B)         | SGN-U578187                                                                                                                              | 1                                         |
| 5-methyl-tetrahydro-pteroyl-triglutamate-homocysteine methyltransferase / methionine synthase | MetS1-3           | Cys, Met (B)    | SGN-U577720                                                                                                                              | 0                                         |
| Acetolactate synthase                                                                         | AHASS             | Ile,Leu,Val(B)  | SGN-U572742                                                                                                                              | 1                                         |
| Aminomethyltransferase                                                                        | AMT               | Gly, Ser, Thr   | SGN-U581864<br>SGN-U579550                                                                                                               | 0<br>1                                    |
| Anthranilate synthase                                                                         | ASA               | Trp (B)         | SGN-U573187<br>SGN-U565950<br>Solyc06g005980.2                                                                                           | 1<br>0<br>4                               |
| Anthranilate phosphoribosyltransferase                                                        | TRP               | Trp (B)         | SGN-U575391<br>SGN-U566340                                                                                                               | 1<br>2                                    |
| Argininosuccinate synthase                                                                    | ARS               | Arg (B)         | SGN-U571375                                                                                                                              | 2                                         |
| Argininosuccinate lyase                                                                       | ARL               | Arg (B)         | SGN-U569657                                                                                                                              | 1                                         |
| Arginine decarboxylase                                                                        | ADC               | Arg (C)         | SGN-U578034<br>SGN-U578741<br>Solyc07g032590.1<br>SGN-U575555                                                                            | 2<br>1<br>1<br>4                          |
| Arogenate dehydrogenase                                                                       | AAT               | Tyr (B)         | SGN-U567861                                                                                                                              | 1                                         |
| Arogenate dehydratase or prephenate dehydratase                                               | PD                | Tyr (B)         | SGN-U573963<br>SGN-U583010<br>SGN-U572934<br>SGN-U562707<br>SGN-U573964                                                                  | 1<br>3<br>0<br>1<br>1                     |
| Asp kinase, monofunctional                                                                    | AK                | Lys(B)          | SGN-U569440                                                                                                                              | 3                                         |
| Asp kinase/homo-Ser dehydrogenase                                                             | AK/HSDH           | Thr (B)         | SGN-U578558<br>SGN-U575816<br>SGN-U601085                                                                                                | 1<br>2<br>3                               |
| Aspartate aminotransferase                                                                    | AST               | Asp (B)         | SGN-U579871<br>SGN-U572392<br>SGN-U580738<br>SGN-U567172<br>SGN-U577882<br>SGN-U572600                                                   | 2<br>0<br>2<br>5<br>0<br>1                |
| Aspartate-ammonia ligase; asparagine synthetase                                               | AsnS/AS1          | Asp, Asn        | SGN-U580427<br>SGN-U577532<br>SGN-U567407<br>SGN-U579303<br>Solyc06g054370<br>SGN-U567030                                                | 2<br>3<br>1<br>4<br>2<br>0                |
| Asp-semialdehyde dehydrogenase                                                                | ASD               | Thr (B)         | SGN-U577135                                                                                                                              | 0                                         |
| Branched-chain amino acid aminotransferase                                                    | BCAT              | Ile,Leu,Val (C) | SGN-U569828<br>SGN-U569830<br>SGN-U569829<br>Solyc00g178340.1<br>SGN-U565681<br>SGN-U569952<br>SGN-U569953<br>SGN-U566152<br>SGN-U579476 | 1<br>2<br>2<br>0<br>2<br>2<br>3<br>3<br>3 |
| Chorismate mutase                                                                             | CM                | Tyr/Phe (B)     | SGN-U575627<br>SGN-U585231                                                                                                               | 0<br>2                                    |
| Cystathionine g-synthase                                                                      | CGS               | Met (B)         | SGN-U584762<br>SGN-U590566<br>Solyc08g008580.2                                                                                           | 1<br>0<br>1                               |

|                                                                                    |         |                    |                                                                                                                                                                                                                                    |                                                               |
|------------------------------------------------------------------------------------|---------|--------------------|------------------------------------------------------------------------------------------------------------------------------------------------------------------------------------------------------------------------------------|---------------------------------------------------------------|
| Cysteine synthase A (pyridoxal-5'-phosphate-dependent enzyme, beta family protein) | CysS    | Cys (B), Met (B)   | SGN-U570112<br>SGN-U579281<br>SGN-U574996<br>SGN-U565167<br>SGN-U585413<br>Solyc04g058120.1<br>SGN-U570460<br>SGN-U570111                                                                                                          | 2<br>0<br>1<br>0<br>2<br>2<br>3<br>2                          |
| Diaminopimelate epimerase                                                          | DAPE    | Lys(B)             | SGN-U569940                                                                                                                                                                                                                        | 1                                                             |
| Dihydrodipicolinate reductase                                                      | DHDPR   | Lys(B)             | SGN-U570280<br>SGN-U578917                                                                                                                                                                                                         | 1<br>1                                                        |
| Dihydrodipicolinate synthase                                                       | DHDPS   | Lys (B)            | SGN-U563416<br>SGN-U563415                                                                                                                                                                                                         | 3<br>3                                                        |
| Glutamate dehydrogenase                                                            | GDH     | Asp, Glu, Arg, Pro | SGN-U574592<br>Solyc06g033860.1<br>SGN-U569234<br>Solyc10g078550.1                                                                                                                                                                 | 4<br>1<br>3<br>1                                              |
| Glutamate synthase NADH                                                            | GLT     | Glu (B), Asp(C)    | SGN-U573931<br>SGN-U602986<br>Solyc08g044270.2                                                                                                                                                                                     | 0<br>5<br>10                                                  |
| Glutamine synthetase o glutamate ammonia ligase                                    | GLN     | Glu (C), Gln (B)   | SGN-U577193                                                                                                                                                                                                                        | 1                                                             |
| Glycine decarboxylase                                                              | GDC     | Gly(C)             | SGN-U580312                                                                                                                                                                                                                        | 0                                                             |
| Homocysteine S-methyltransferase                                                   | HMT3    | Met (B)            | SGN-U582642<br>SGN-U565941                                                                                                                                                                                                         | 2<br>4                                                        |
| Homo-Ser kinase                                                                    | HSK     | Thr (B)            | SGN-U582271                                                                                                                                                                                                                        | 0                                                             |
| Indole-3-glycerol phosphate synthase                                               | IGPS    | Trp (B)            | SGN-U563660                                                                                                                                                                                                                        | 5                                                             |
| Isopropylmalate synthase                                                           | IPMS    | Leu (B)            | SGN-U580754                                                                                                                                                                                                                        | 0                                                             |
| Ketol acid reductoisomerase                                                        | KARI    | Ile, Val, Leu (B)  | SGN-U572728<br>SGN-U572725                                                                                                                                                                                                         | 0<br>2                                                        |
| L,L-Diaminopimelate aminotransferase                                               | AGD     | Lys(B)             | SGN-U585208<br>SGN-U604034                                                                                                                                                                                                         | 0<br>6                                                        |
| L-asparaginase                                                                     | ASNASE  | Asp(C)             | SGN-U588928<br>SGN-U564199<br>SGN-U583152<br>SGN-U603975<br>SGN-U566421                                                                                                                                                            | 0<br>0<br>4<br>0<br>2                                         |
| Lys-ketoglutarate reductase / saccharopine dehydrogenase                           | LKR/SDH | Lys(C)             | Solyc07g017670.1                                                                                                                                                                                                                   | 1                                                             |
| Methionine gamma lyase                                                             | MGL     | Met (C)            | SGN-U565646                                                                                                                                                                                                                        | 2                                                             |
| Methylthioalkylmalate synthase or 2-isopropylmalate synthase                       | MAM     | Met (C)            | SGN-U580754                                                                                                                                                                                                                        | 0                                                             |
| N-acetyl-gamma-glutamyl-phosphate reductase                                        |         | Arg (B)            | SGN-U562906                                                                                                                                                                                                                        | 1                                                             |
| Orn d-aminotransferase                                                             | d-OAT   | Pro (B)            | SGN-U563984                                                                                                                                                                                                                        | 1                                                             |
| Orn carbamoyltransferase complex                                                   | OCT     | Pro (B)            | SGN-U575137<br>SGN-U575134                                                                                                                                                                                                         | 2<br>0                                                        |
| Phe-Ala ammonia lyase                                                              | PAL     | Phe (C)            | SGN-U580050<br>SGN-U581452<br>SGN-U590436<br>SGN-U577267<br>Solyc09g007890.1<br>SGN-U581307<br>SGN-U577677<br>Solyc03g036470.1<br>Solyc03g036480.1<br>Solyc03g071870.1<br>Solyc03g078270.1<br>Solyc03g078280.1<br>Solyc10g011920.1 | 0<br>0<br>1<br>1<br>0<br>2<br>3<br>1<br>0<br>3<br>3<br>3<br>0 |

|                                                                     |             |                   |                  |   |
|---------------------------------------------------------------------|-------------|-------------------|------------------|---|
| Phosphoglycerate dehydrogenase                                      | PHGDH       | Ser (B)           | SGN-U566348      | 1 |
|                                                                     |             |                   | SGN-U601541      | 0 |
| Pyrroline-5-carboxylate synthetase                                  | P5CS        | Pro (B)           | Solyc08g043170   | 2 |
| Pyrroline-5-carboxylate reductase                                   | P5CR        | Pro (B), Glu (B)  | SGN-U567857      | 3 |
| Pro dehydrogenase/Pro oxidase                                       | ERD5, PRODH | Pro (C), Glu (B)  | SGN-U581540      | 2 |
|                                                                     |             |                   | SGN-U578070      | 3 |
| S-Adenosyl-Met synthetase                                           | SAMS 1-4    | Met (C)           | SGN-U580783      | 3 |
|                                                                     |             |                   | SGN-U580893      | 3 |
|                                                                     |             |                   | SGN-U577991      | 3 |
| Serine hydroxymethyltransferase or glycine hydroxymethyltransferase | SHMT        | Ser, Gly, Lys (C) | SGN-U575015      | 0 |
|                                                                     |             |                   | SGN-U581543      | 0 |
|                                                                     |             |                   | SGN-U578810      | 3 |
|                                                                     |             |                   | SGN-U580665      | 2 |
|                                                                     |             |                   | SGN-U565354      | 1 |
|                                                                     |             |                   | SGN-U565355      | 0 |
| SGN-U577665                                                         | 4           |                   |                  |   |
| Serine O-acetyltransferase 2;1                                      | SERAT2;1    | Cys, Met (B)      | SGN-U573965      | 0 |
|                                                                     |             |                   | SGN-U582407      | 0 |
|                                                                     |             |                   | SGN-U582417      | 1 |
| Threonine aldolase                                                  | THA1        | Thr (C)           | SGN-U583452      | 0 |
| Threonine synthase                                                  | TS          | Thr (B)           | SGN-U573081      | 3 |
|                                                                     |             |                   | SGN-U573082      | 0 |
| Threonine deaminase                                                 | TD          | Thr (C), Ile (B)  | SGN-U570558      | 1 |
| Tryptophan synthase a                                               | TSA         | Trp (B)           | SGN-U576881      | 2 |
| Tryptophan synthase b                                               | TSB         | Trp (B)           | SGN-U581112      | 3 |
|                                                                     |             |                   | SGN-U585350      | 1 |
|                                                                     |             |                   | SGN-U580593      | 2 |
|                                                                     |             |                   | SGN-U603314      | 0 |
| Tyrosine aminotransferase                                           | TAT         | Tyr (C)           | SGN-U566233      | 0 |
|                                                                     |             |                   | SGN-U577103      | 1 |
|                                                                     |             |                   | Solyc10g008200.2 | 3 |
|                                                                     |             |                   | SGN-U563404      | 1 |

\* (B) = biosynthesis; (C) = catabolism
